# Supplementary material for: Dairy Cows Grazing Plantain-Based Pastures Have Increased Urine Patches and Reduced Urine N Concentration That Potentially Decreases N Leaching from a Pastoral System
Source: MDPI journal article supplement (doi:10.3390/ani13030528), 2023-02-02
Supplement: s1 [file s1]

Equation S1. Estimation of the area covered by urine patches

Urine patch area ( $\text{m}^2/\text{cow}/\text{day}$ ) = daily urination volume ( $\text{m}^3$ )  $\div$  urine column (m)  $\times$  number of urination per day [15], assuming a urine column to be 9 mm [2].

Equation S2. Estimation of urinary nitrogen (UN) load

N load at urine patches ( $\text{kg}/\text{ha}$ ) = UN excretion (kg)  $\div$  urine patch area (ha) [15],

where, UN excretion (kg) = urine volume (L)  $\times$  UN concentration (kg/L).
